# Supplementary material
Source: publisher site journal article supplement (https://www.dovepress.com/article/334838)
Supplement: Supplementary file 1 [file get_supplementary_file.php]

Supplementary List 1. Quantitative Survey Items and Scales

**Role Strain** {strongly agree, disagree, neither agree nor disagree, agree, strongly agree}

*Role Certainty*

- I have clear planned goals and objectives for my work at work.
- I know what is expected of me at work.
- I know what my responsibilities are at work.
- I feel certain about how much responsibility I have at work.
- My responsibilities are clearly defined at work.

*Role Conflict*

- I often get involved in situations in which there are conflicting requirements at work.
- I receive incompatible requests from two or more people while at work.
- In my work, there is a lack of standardization in the performance of common tasks. As a result I have to do the same task differently at different locations or under different circumstances.

*Role Overload*

- There is a need to reduce some parts of my work.
- I feel overburdened in my role(s) at work.
- I am given too many responsibilities at work.
- My workload is too heavy at work.
- The amount of work I have to do interferes with the quality I want to maintain while I work.

**Work-Family Conflict**

The questions below ask you about work-life balance. Please think specifically about your own work and home/family life, not about what you may perceive as the work-life balance in your role at **[organization]** in general {strongly disagree, disagree, neither agree nor disagree, agree, strongly agree}

*Multiple Role Flexibility*

- I am able to adjust my schedule to accommodate my personal or family needs.
- I am able to use my multiple roles at work (research, education, admistrative, etc.) to create a more flexible schedule that accommodates my personal or family needs.

*Work into Family Conflict*

- The demands of my work interfere with my home/family life.
- The amount of time my job takes up makes it difficult to fulfill my home/family responsibilities.
- Things I want to do at home do not get done because of the demands my job puts on me.
- My job produces strain that makes it difficult to make changes to my family/home related activities.
- Due to work-related duties, I have to make changes to my plans for family or home-related activities.

*Family into Work Conflict*

- I have to put off doing things at work because of the demands on my time at home.
- Things I want to do at work don’t get done because of the demands of my home/family life.
- My home life interferes with my responsibilities at work such as getting to work on time, accomplishing daily tasks, and working overtime.
- Home and family-related strain interferes with my ability to perform job-related duties.

**Organizational Commitment and Support**

The questions below as you to think about **[organization]** as an institution. {strongly disagree, disagree, neither agree nor agree, agree, strongly agree}

*Commitment to the Organization*

- I really feel as if **[organization’s]** problems as an institution are my own.
- I feel strong sense of “belonging” to **[organization]** as an institution.
- I feel “emotionally attached” to **[organization]** as an institution.
- I feel like “part of the family” at **[organization]** as an organization.
- I would be very happy to spend the rest of my career with **[organization]**.

*Support from the Organization*

- **[Organization]** as an institution, cares about my general satisfaction at work.
- **[Organization]** as an institution, strongly considers my goals and values.
- Help is available from **[organization]** when I have a problem.
- **[Organization]** as an institution really cares about my well-being.
- **[Organization],** as an institution, is willing to extend itself in order to help me perform my job to the best of my ability.
- If I did the best job possible, **[organization]** would definitely recognize that.
- **[Organization]**, as an institution, cares about my general satisfaction at work.
- **[Organization]**, as an institution, shows a great deal of concern for me.
- **[Organization]**, as an institution, cares about my opinions.

**Departmental Commitment and Support**

The questions below ask you to think about your own Chair or Supervisor and/or Clinic or Department at **[organization]**. {strongly disagree, disagree, neither agree nor agree, agree, strongly agree}

*Commitment to the Department*

- I really feel as if my clinic or department’s problems are my own.
- I feel a strong sense of “belonging” to my clinic/department.
- I feel “emotionally attached” to my clinic/department.
- I feel like “part of the family” in my clinic/department.

*Support from the Department*

- My supervisor/chair is the person with the greatest effect on my career advancement.
- My supervisor/chair strongly considers my goals and values.
- Help is available from my chair or direct supervisor when I have a problem.
- My supervisor/chair really cares about my well-being.
- My direct supervisor is willing to extend him/herself in order to help me perform my job to the best of my ability.
- If I did the best job possible, my chair/supervisor would definitely recognize that.
- My supervisor/chair cares about my general satisfaction at work.
- My supervisor/chair cares about my opinions.
- My supervisor/chair takes pride my accomplishments at work.

*Promotion Climate Equity*

- There are good opportunities for promotion in my department/clinic.
- The opportunities for promotion are somewhat limited in my department/clinic.
- I feel that I will be promoted based on my ability in my department/clinic.
- Promotions in my department/clinic are infrequent.
- Promotions in my department/clinic occur at a reasonable pace.
- My chances for promotion in my department/clinic are fairly good.
- I feel/felt that the promotion process in my department/clinic is clear.
- In my department/clinic the hierarchy and organizational structure is difficult to understand and negotiate.
- I know what I need to do to be promoted in my department/clinic.
- I feel well mentored toward my promotion in my department/clinic.

**Outcome Variables**

*Intent to Leave*

- Do you intend to leave **[organization]** in the next two years? {no, unsure, yes}

*Promotion Aspirations*

- I am actively seeking promotion to the next academic rank. {strongly disagree, disagree, neither agree nor disagree, agree, strongly agree}

*Leadership Aspirations*{strongly disagree, disagree, neither agree nor disagree, agree, strongly agree}

- I desire to be promoted to a leadership role.
- I feel ready for a promotion to a leadership role.
- Decisions are made fairly when choosing faculty for leadership roles.

Supplementary List 2. Qualitative Survey Questions

*Promotion Aspirations*

- Please comment on your personal experience regarding promotion at/in your department/clinic.
- Please share with us your feelings/opinions regarding advancing in academic rank while at [**organization**].

*Leadership Aspirations*

- Please tell us why you chose the answer that you did regarding promotion to a leadership role at [**organization**]. (Following quantitative *leadership aspirations* scale).
- Is there anything you would like to tell us regarding leadership and promotion opportunities in academic medicine or academic research in general (not specific to [**organization**])?

*Intentions to Leave*

- Please tell us under what circumstances you would leave [**organization**]?
- Please tell us what might induce you to stay at [**organization**]?

| Supplementary Table 1. Bivariate Correlations for all variables used in the study | | | | | | | | | | | | | | | | | | | |
| --- | --- | --- | --- | --- | --- | --- | --- | --- | --- | --- | --- | --- | --- | --- | --- | --- | --- | --- | --- |
|  |  | T | R | G | Ch | RCe | RCo | RO | MRF | WIF | FIW | OC | OS | DC | DS | PC | PA | LA | IL | |
| T | Corr. | 1 |  |  |  |  |  |  |  |  |  |  |  |  |  |  |  |  |  | |
|  | Sig. |  |  |  |  |  |  |  |  |  |  |  |  |  |  |  |  |  |  | |
| R | Corr. | **.366**** | 1 |  |  |  |  |  |  |  |  |  |  |  |  |  |  |  |  | |
|  | Sig. | 0.000 |  |  |  |  |  |  |  |  |  |  |  |  |  |  |  |  |  | |
| G | Corr. | -0.078 | -0.019 | 1 |  |  |  |  |  |  |  |  |  |  |  |  |  |  |  | |
|  | Sig. | 0.188 | 0.743 |  |  |  |  |  |  |  |  |  |  |  |  |  |  |  |  | |
| C | Corr. | -0.032 | **-.122*** | 0.027 | 1 |  |  |  |  |  |  |  |  |  |  |  |  |  |  | |
|  | Sig. | 0.588 | 0.041 | 0.647 |  |  |  |  |  |  |  |  |  |  |  |  |  |  |  | |
| RCe | Corr. | **.240**** | **.189**** | **-.146*** | -0.035 | 1 |  |  |  |  |  |  |  |  |  |  |  |  |  | |
|  | Sig. | 0.000 | 0.001 | 0.013 | 0.563 |  |  |  |  |  |  |  |  |  |  |  |  |  |  | |
| RCo | Corr. | -0.108 | -0.091 | 0.012 | -0.045 | **-.392**** | 1 |  |  |  |  |  |  |  |  |  |  |  |  | |
|  | Sig. | 0.066 | 0.121 | 0.844 | 0.447 | 0.000 |  |  |  |  |  |  |  |  |  |  |  |  |  | |
| RO | Corr. | -0.083 | -0.074 | 0.047 | -0.037 | **-.191**** | **.476**** | 1 |  |  |  |  |  |  |  |  |  |  |  | |
|  | Sig. | 0.160 | 0.210 | 0.425 | 0.540 | 0.001 | 0.000 |  |  |  |  |  |  |  |  |  |  |  |  | |
| MRF | Corr. | **.265**** | 0.095 | 0.089 | -0.109 | **.252**** | **-.241**** | **-.279**** | 1 |  |  |  |  |  |  |  |  |  |  | |
|  | Sig. | 0.000 | 0.104 | 0.135 | 0.067 | 0.000 | 0.000 | 0.000 |  |  |  |  |  |  |  |  |  |  |  | |
| WIF | Corr. | **-.176**** | **-.163**** | 0.014 | -0.004 | **-.269**** | **.399**** | **.633**** | **-.366**** | 1 |  |  |  |  |  |  |  |  |  | |
|  | Sig. | 0.003 | 0.005 | 0.811 | 0.942 | 0.000 | 0.000 | 0.000 | 0.000 |  |  |  |  |  |  |  |  |  |  | |
| FIW | Corr. | -0.065 | **-.238**** | 0.021 | **-.171**** | -0.100 | 0.099 | 0.105 | 0.114 | **.180**** | 1 |  |  |  |  |  |  |  |  | |
|  | Sig. | 0.273 | 0.000 | 0.725 | 0.004 | 0.089 | 0.093 | 0.074 | 0.052 | 0.002 |  |  |  |  |  |  |  |  |  | |
| CO | Corr. | -0.017 | -0.032 | **-.148*** | 0.026 | **.289**** | -0.092 | **-.115*** | **.116*** | -0.042 | -0.024 | 1 |  |  |  |  |  |  |  | |
|  | Sig. | 0.779 | 0.584 | 0.012 | 0.664 | 0.000 | 0.117 | 0.049 | 0.047 | 0.476 | 0.680 |  |  |  |  |  |  |  |  | |
| SO | Corr. | 0.051 | -0.074 | -0.109 | 0.008 | **.402**** | **-.244**** | **-.220**** | **.318**** | **-.217**** | 0.062 | **.685**** | 1 |  |  |  |  |  |  | |
|  | Sig. | 0.386 | 0.210 | 0.065 | 0.889 | 0.000 | 0.000 | 0.000 | 0.000 | 0.000 | 0.292 | 0.000 |  |  |  |  |  |  |  | |
| CD | Corr. | 0.047 | -0.068 | **-.154**** | -0.008 | **.349**** | **-.204**** | **-.154**** | **.194**** | **-.128*** | -0.024 | **.546**** | **.516**** | 1 |  |  |  |  |  | |
|  | Sig. | 0.428 | 0.249 | 0.009 | 0.896 | 0.000 | 0.000 | 0.009 | 0.001 | 0.030 | 0.689 | 0.000 | 0.000 |  |  |  |  |  |  | |
| SD | Corr. | 0.049 | **-.138*** | **-.188**** | -0.033 | **.457**** | **-.252**** | **-.141*** | **.326**** | **-.159**** | 0.005 | **.482**** | **.595**** | **.706**** | 1 |  |  |  |  | |
|  | Sig. | 0.405 | 0.019 | 0.001 | 0.580 | 0.000 | 0.000 | 0.016 | 0.000 | 0.007 | 0.936 | 0.000 | 0.000 | 0.000 |  |  |  |  |  | |
| PC | Corr. | **.275**** | 0.102 | -0.124 | 0.050 | **.501**** | **-.251**** | **-.132*** | **.251**** | **-.163**** | **-.140*** | **.392**** | **.463**** | **.536**** | **.608**** | 1 |  |  |  | |
|  | Sig. | 0.000 | 0.107 | 0.051 | 0.441 | 0.000 | 0.000 | 0.037 | 0.000 | 0.010 | 0.027 | 0.000 | 0.000 | 0.000 | 0.000 |  |  |  |  | |
| PA | Corr. | 0.113 | **-.170**** | -0.016 | 0.021 | -0.015 | 0.026 | **.132*** | 0.060 | 0.067 | -0.064 | 0.049 | **.177**** | **.147*** | **.260**** | **.201**** | 1 |  |  | |
|  | Sig. | 0.070 | 0.006 | 0.794 | 0.736 | 0.808 | 0.674 | 0.035 | 0.337 | 0.283 | 0.304 | 0.431 | 0.004 | 0.019 | 0.000 | 0.003 |  |  |  | |
| LA | Corr. | **.135*** | **.307**** | -0.083 | -0.093 | -0.049 | **.229**** | 0.110 | -0.019 | 0.065 | **-.174**** | 0.118 | -0.050 | 0.032 | -0.032 | -0.059 | **.133*** | 1 |  | |
|  | Sig. | 0.025 | 0.000 | 0.169 | 0.128 | 0.418 | 0.000 | 0.068 | 0.757 | 0.281 | 0.004 | 0.051 | 0.413 | 0.598 | 0.595 | 0.364 | 0.036 |  |  | |
| IL | Corr. | **.118*** | **.161**** | -0.083 | 0.016 | **-.209**** | 0.094 | **.123*** | **-.161**** | 0.070 | **-.125*** | **-.329**** | **-.401**** | **-.302**** | **-.311**** | **-.233**** | **-.170**** | 0.096 | 1 | |
|  | Sig. | 0.044 | 0.006 | 0.161 | 0.784 | 0.000 | 0.110 | 0.036 | 0.006 | 0.235 | 0.033 | 0.000 | 0.000 | 0.000 | 0.000 | 0.000 | 0.006 | 0.111 |  | |

Bivariate correlations of all variables used in the study. Bolded numbers represent statistically significant correlations. Corr. (Pearson Correlation); Sig. (Two-tailed statistical significance); T (*Track*); R (*Rank*); G (*Gender*); C (*Child/Children*); RCe (*Role Certainty*); RCo (*Role Conflict*); RO (*Role Overload*); MRF (*Multiple Role Flexibility*); WIF (*Work into Family Conflict)*; FIW (*Family into Work Conflict*); CO (*Commitment to Org.*); SO (*Support from Org.*); CD (*Commitment to Dept.*); SD (*Support from Dept.*); PC (*Promotion Climate*); PA (*Promotion Aspirations*); LA (*Leadership Aspirations*); IL (*Intentions to Leave*)

Supplementary Table 2. Hierarchical Regression Analysis for Promotion Aspirations

| a | **Step 1** | **Step 2** | **Step 3** | **Step 4** | **Step 5** |
| --- | --- | --- | --- | --- | --- |
| R Square | 0.079 | 0.107 | 0.127 | 0.157 | 0.215 |
| R Square (Adjusted) | 0.061 | 0.077 | 0.084 | 0.106 | 0.155 |
| R Square Change | **0.079****  (p = 0.002) | 0.029  (p = 0.088) | 0.02  (p = 0.210) | **0.030***  (p = 0.030) | **0.058****  (p = 0.003) |
|  |  |  |  |  |  |
| b | *Adjusted β Weights* | *Adjusted β Weights* | *Adjusted β Weights* | *Adjusted β Weights* | *Adjusted β Weights* |
| *Gender* | -0.042  (p = 0.528) | -0.048  (p = 0.478) | -0.065  (p = 0.343) | -0.064  (p = 0.343) | -0.032  (p = 0.633) |
| *Track* | **0.244****  (p = 0.001) | **0.242****  (p = 0.001) | **0.233****  (p = 0.002) | **0.238****  (p = 0.001) | **0.218****  (p = 0.003) |
| *Rank* | **-0.251****  (p = 0.001) | **-0.256****  (p < 0.001) | **-0.294****  (p < 0.001) | **-0.273****  (p < 0.001) | **-0.218****  (p = 0.004) |
| *Children* | -0.026  (p = 0.701) | -0.021  (p = 0.759) | -0.038  (p = 0.581) | -0.041  (p = 0.545) | -0.038  (p = 0.565) |
|  |  |  |  |  |  |
| *Role Certainty* |  | -0.022  (p = 0.765) | -0.049  (p = 0.517) | -0.089  (p = 0.267) | **-0.182***  (p = 0.028) |
| *Role Conflict* |  | -0.1  (p = 0.206) | -0.095  (p = 0.233) | -0.083  (p = 0.290) | -0.051  (p = 0.506) |
| *Role Overload* |  | **0.190***  (p = 0.012) | **0.210***  (p = 0.020) | **0.209***  (p = 0.019) | **0.213***  (p = 0.014) |
|  |  |  |  |  |  |
| *Multiple Role Flexibility* |  |  | 0.096  (p = 0.209) | 0.066  (p = 0.392) | 0.015  (p = 0.847) |
| *Work into Family Conflict* |  |  | 0.011  (p = 0.902) | 0.044  (p = 0.622) | 0.024  (p = 0.782) |
| *Family into Work Conflict* |  |  | -0.138  (p = 0.057) | **-0.173***  (p = 0.018) | **-0.153***  (p = 0.033) |
|  |  |  |  |  |  |
| *Commitment to Org* |  |  |  | -0.163  (p = 0.076) | **-0.203***  (p = 0.033) |
| *Support from Org* |  |  |  | **0.260****  (p = 0.008) | 0.16  (p = 0.109) |
|  |  |  |  |  |  |
| *Commitment to Dept* |  |  |  |  | -0.083  (p = 0.438) |
| *Support from Dept* |  |  |  |  | **0.322****  (p = 0.006) |
| *Promotion Climate* |  |  |  |  | 0.099  (p = 0.274) |

a. For each step of the regression model, effect size on variance (R2 change) along with R2 and adjusted R2 are presented. Significant effect sizes with *p* < 0.05 are marked in bold and with *.

b. Beta weights significantly larger than 0 are marked as * for *p* < 0.05 and ** for *p* < 0.01. For *Gender*, Male = 1, Female = 2. For *Track*, Clinical = 1, Hybrid = 2, and Research = 3. For *Rank*, Assistant = 1, Associate = 2, and Full Professor = 3. For *Children*, Yes = 1, and No = 2.

Supplementary Table 3. Hierarchical Regression Analysis for Leadership Aspirations

| a | **Step 1** | **Step 2** | **Step 3** | **Step 4** | **Step 5** |
| --- | --- | --- | --- | --- | --- |
| R Square | 0.093 | 0.155 | 0.192 | 0.218 | 0.236 |
| R Square (Adjusted) | 0.077 | 0.129 | 0.156 | 0.176 | 0.183 |
| R Square Change | **0.093****  (p < 0.001) | **0.063****  (p = 0.001) | **0.037***  (p = 0.020) | **0.026***  (p = 0.027) | 0.017  (p = 0.181) |
|  |  |  |  |  |  |
| b | *Adjusted β Weights* | *Adjusted β Weights* | *Adjusted β Weights* | *Adjusted β Weights* | *Adjusted β Weights* |
| *Gender* | -0.088  (p = 0.168) | -0.101  (p = 0.111) | -0.111  (p = 0.081) | -0.107  (p = 0.091) | -0.101  (p = 0.110) |
| *Track* | 0.022  (p = 0.748) | 0.053  (p = 0.438) | 0.048  (p = 0.484) | 0.054  (p = 0.428) | 0.076  (p = 0.273) |
| *Rank* | **0.260****  (p < 0.001) | **0.285****  (p < 0.001) | **0.231****  (p = 0.001) | **0.227****  (p = 0.001) | **0.249****  (p < 0.001) |
| *Children* | -0.072  (p = 0.258) | -0.066  (p = 0.289) | -0.094  (p = 0.131) | -0.101  (p = 0.102) | -0.088  (p = 0.153) |
|  |  |  |  |  |  |
| *Role Certainty* |  | -0.057  (p = 0.413) | -0.086  (p = 0.216) | -0.109  (p = 0.135) | -0.09  (p = 0.242) |
| *Role Conflict* |  | **0.219****  (p = 0.003) | **0.222****  (p = 0.003) | **0.204****  (p = 0.006) | **0.201****  (p = 0.006) |
| *Role Overload* |  | 0.022  (p = 0.757) | 0.056  (p = 0.496) | 0.069  (p = 0.398) | 0.076  (p = 0.348) |
|  |  |  |  |  |  |
| *Multiple Role Flexibility* |  |  | 0.072  (p = 0.313) | 0.075  (p = 0.300) | 0.073  (p = 0.317) |
| *Work into Family Conflict* |  |  | -0.001  (p = 0.988) | -0.038  (p = 0.652) | -0.026  (p = 0.759) |
| *Family into Work Conflict* |  |  | **-0.206****  (p = 0.002) | **-0.181****  (p = 0.007) | **-0.199****  (p = 0.003) |
|  |  |  |  |  |  |
| *Commitment to Org* |  |  |  | **0.234****  (p = 0.007) | **0.217***  (p = 0.019) |
| *Support from Org* |  |  |  | -0.158  (p = 0.094) | -0.154  (p = 0.113) |
|  |  |  |  |  |  |
| *Commitment to Dept* |  |  |  |  | 0.034  (p = 0.725) |
| *Support from Dept* |  |  |  |  | 0.121  (p = 0.263) |
| *Promotion Climate* |  |  |  |  | **-0.175***  (p = 0.040) |

a. For each step of the regression model, effect size on variance (R2 change) along with R2 and adjusted R2 are presented. Significant effect sizes with *p* < 0.05 are marked in bold and with *.

b. Beta weights significantly larger than 0 are marked as * for *p* < 0.05 and ** for *p* < 0.01. For *Gender*, Male = 1, Female = 2. For *Track*, Clinical = 1, Hybrid = 2, and Research = 3. For *Rank*, Assistant = 1, Associate = 2, and Full Professor = 3. For *Children*, Yes = 1, and No = 2.

Supplementary Table 4. Hierarchical Regression Analysis for Intentions to Leave

| a | **Step 1** | **Step 2** | **Step 3** | **Step 4** | **Step 5** |
| --- | --- | --- | --- | --- | --- |
| R Square | 0.05 | 0.143 | 0.164 | 0.249 | 0.269 |
| R Square (Adjusted) | 0.034 | 0.117 | 0.128 | 0.209 | 0.22 |
| R Square Change | **0.05***  (p = 0.016) | **0.092****  (p < 0.001) | 0.021  (p = 0.122) | **0.085****  (p < 0.001) | 0.02  (p = 0.111) |
|  |  |  |  |  |  |
| b | *Adjusted β Weights* | *Adjusted β Weights* | *Adjusted β Weights* | *Adjusted β Weights* | *Adjusted β Weights* |
| *Gender* | **-0.136***  (p = 0.035) | **-0.184****  (p = 0.003) | **-0.170****  (p = 0.008) | **-0.201****  (p = 0.001) | **-0.207****  (p = 0.001) |
| *Track* | 0.021  (p = 0.761) | 0.07  (p = 0.294) | 0.097  (p = 0.161) | 0.077  (p = 0.241) | 0.095  (p = 0.153) |
| *Rank* | **0.158***  (p = 0.023) | **0.192****  (p = 0.004) | **0.152***  (p = 0.028) | 0.115  (p = 0.083) | 0.113  (p = 0.095) |
| *Children* | -0.015  (p = 0.811) | -0.011  (p = 0.858) | -0.042  (p = 0.498) | -0.028  (p = 0.645) | -0.021  (p = 0.728) |
|  |  |  |  |  |  |
| *Role Certainty* |  | **-0.281****  (p < 0.001) | **-0.283****  (p < 0.001) | **-0.167***  (p = 0.018) | -0.129  (p = 0.082) |
| *Role Conflict* |  | -0.073  (p = 0.321) | -0.074  (p = 0.310) | -0.77  (p = 0.270) | -0.091  (p = 0.197) |
| *Role Overload* |  | **0.157***  (p = 0.024) | **0.172***  (p = 0.040) | 0.149  (p = 0.062) | 0.154  (p = 0.053) |
|  |  |  |  |  |  |
| *Multiple Role Flexibility* |  |  | -0.084  (p = 0.244) | -0.018  (p = 0.792) | -0.016  (p = 0.825) |
| *Work into Family Conflict* |  |  | -0.043  (p = 0.617) | -0.051  (p = 0.532) | -0.045  (p = 0.584) |
| *Family into Work Conflict* |  |  | -0.118  (p = 0.077) | -0.095  (p = 0.142) | -0.11  (p = 0.092) |
|  |  |  |  |  |  |
| *Commitment to Org* |  |  |  | -0.094  (p = 0.258) | -0.038  (p = 0.666) |
| *Support from Org* |  |  |  | **-0.260****  (p = 0.004) | **-0.231****  **(**p = 0.013) |
|  |  |  |  |  |  |
| *Commitment to Dept* |  |  |  |  | -0.152  (p = 0.100) |
| *Support from Dept* |  |  |  |  | -0.081  (p = 0.432) |
| *Promotion Climate* |  |  |  |  | -0.115  (p = 0.158) |

a. For each step of the regression model, effect size on variance (R2 change) along with R2 and adjusted R2 are presented. Significant effect sizes with *p* < 0.05 are marked in bold and with *.

b. Beta weights significantly larger than 0 are marked as * for *p* < 0.05 and ** for *p* < 0.01. For *Gender*, Male = 1, Female = 2. For *Track*, Clinical = 1, Hybrid = 2, and Research = 3. For *Rank*, Assistant = 1, Associate = 2, and Full Professor = 3. For *Children*, Yes = 1, and No = 2.
